# Supplementary material for: Exploring Taxifolin Polymorphs: Insights on Hydrate and Anhydrous Forms
Source: MDPI journal article supplement (doi:10.3390/pharmaceutics13091328), 2021-08-25
Supplement: s1 [file s1]

# Supplementary Materials: Exploring taxifolin polymorphs: insights on hydrate and anhydrous forms

Fernanda Cristina Stenger Moura, Nicola Pinna, Riccardo Vivani, Gisele Elias Nunes, Aurélie Schoubben, Tania Mari Bellé Bresolin <sup>1</sup>, Ivan Helmuth Bechold <sup>3</sup> and Maurizio Ricci

**Table S1.** Structural data and refinement details for **Phase 3**.

| Empirical formula                        | C <sub>15</sub> H <sub>12</sub> O <sub>7</sub> |
|------------------------------------------|------------------------------------------------|
| Formula weight                           | 304.25                                         |
| Crystal system                           | Monoclinic                                     |
| Space Group                              | P 1 2 <sub>1</sub> /a 1 (14)                   |
| <i>a</i> /Å                              | 17.4802(9)                                     |
| <i>b</i> /Å                              | 5.31212(19)                                    |
| <i>c</i> /Å                              | 14.3378(7)                                     |
| $\alpha$ /deg.                           | 90                                             |
| $\beta$ /deg.                            | 106.0140(27)                                   |
| $\gamma$ /deg.                           | 90                                             |
| Volume/Å <sup>3</sup>                    | 1279.70(10)                                    |
| Z                                        | 4                                              |
| Calculated density/g·cm <sup>-3</sup>    | 1.579                                          |
| Data range/ $2\theta$ ·deg <sup>-1</sup> | 4 - 80                                         |
| Wavelength/Å                             | 1.54056                                        |
| N. of data points                        | 4470                                           |
| Reflections collected, unique            | 966                                            |
| N. of parameters                         | 114                                            |
| N. of restraints                         | 73                                             |
| <i>R<sub>p</sub></i>                     | 0.0486                                         |
| <i>R<sub>wp</sub></i>                    | 0.0636                                         |
| <i>R<sub>f2</sub></i>                    | 0.06106                                        |
| GOF                                      | 3.38                                           |

$$R_p = \sum |I_o - I_c| / \sum I_o; R_{wp} = [\sum w(I_o - I_c)^2 / \sum w I_o^2]^{1/2}; R_{f2} = \sum |F_o^2 - F_c^2| / \sum |F_o^2|; GOF = [\sum w(I_o - I_c)^2 / (N_o - N_{var})]^{1/2}$$

**Table S2.** Atomic positional parameters for **Phase 3**.

| Atom | x/a (Å)   | y/b (Å)    | z/c (Å)    |
|------|-----------|------------|------------|
| C1   | 0.9699(7) | 0.5344(21) | 0.1944(8)  |
| C2   | 0.9181(8) | 0.5520(27) | 0.2525(10) |
| C3   | 0.8512(7) | 0.8920(26) | 0.1521(7)  |
| C4   | 0.8990(8) | 0.8590(26) | 0.0922(11) |
| C5   | 0.9545(8) | 0.6688(24) | 0.1092(9)  |
| C6   | 0.8586(9) | 0.7325(25) | 0.2326(13) |
| O1   | 1.0251(7) | 0.3498(19) | 0.2108(9)  |
| O2   | 0.7990(5) | 0.7104(16) | 0.2764(8)  |
| C7   | 0.7566(4) | 0.9298(16) | 0.2718(5)  |
| C8   | 0.7131(5) | 0.9937(16) | 0.1650(5)  |
| C9   | 0.7750(5) | 1.0368(18) | 0.1112(6)  |
| O3   | 0.7740(6) | 1.2257(22) | 0.0597(10) |
| O4   | 0.8925(7) | 1.0220(22) | 0.0177(8)  |
| C10  | 0.6969(5) | 0.9015(17) | 0.3327(6)  |
| C11  | 0.7060(8) | 1.0520(28) | 0.4135(9)  |
| C12  | 0.6525(8) | 1.0350(22) | 0.4684(11) |
| C13  | 0.5993(8) | 0.8364(21) | 0.4536(9)  |
| C14  | 0.5913(6) | 0.6765(17) | 0.3751(7)  |
| C15  | 0.6472(9) | 0.6913(22) | 0.3215(12) |
| O5   | 0.5653(8) | 0.7727(20) | 0.5242(8)  |
| O6   | 0.5485(7) | 0.4641(20) | 0.3726(8)  |
| O7   | 0.6650(6) | 1.1970(21) | 0.1568(8)  |

**Table S3.** Bond distances for **Phase 3**.

| Atom 1 | Atom 2 | Length (Å) |
|--------|--------|------------|
| C1     | C2     | 1.392(6)   |
| C1     | C5     | 1.376(6)   |
| C1     | O1     | 1.351(6)   |
| C2     | C6     | 1.385(6)   |
| C3     | C4     | 1.365(6)   |
| C3     | C6     | 1.408(6)   |
| C3     | C9     | 1.509(6)   |
| C4     | C5     | 1.375(6)   |
| C4     | O4     | 1.356(6)   |
| C6     | O2     | 1.363(5)   |
| C7     | O2     | 1.373(6)   |
| C7     | C8     | 1.547(6)   |
| C7     | C10    | 1.541(5)   |
| C8     | C9     | 1.510(6)   |
| C8     | O7     | 1.354(6)   |
| C9     | O3     | 1.243(6)   |
| O3     | C9     | 1.243(6)   |
| O4     | C4     | 1.356(6)   |
| C10    | C11    | 1.381(6)   |
| C10    | C15    | 1.398(6)   |
| C11    | C12    | 1.380(6)   |
| C12    | C13    | 1.384(6)   |
| C13    | C14    | 1.386(6)   |
| C13    | O5     | 1.350(6)   |
| C14    | C15    | 1.401(6)   |
| C14    | O6     | 1.349(6)   |

**Table S4.** Intermolecular bond distances for **Phase 3**.

| Atom 1 | Atom 2 | Length (Å) |
|--------|--------|------------|
| O1     | O6     | 2.79(2)    |
| O1     | O7     | 2.77(1)    |
| O4     | O7     | 2.98(2)    |
| O5     | O6     | 3.05(2)    |
| O3     | O3     | 3.15(2)    |

**Table S5.** Bond angles for Phase 3.

| Atom 1 | Atom 2 | Atom 3 | Amplitude (°) |
|--------|--------|--------|---------------|
| C2     | C1     | C5     | 119.8(4)      |
| C2     | C1     | O1     | 119.8(4)      |
| C5     | C1     | O1     | 119.1(6)      |
| C1     | C2     | C6     | 119.9(4)      |
| C4     | C3     | C6     | 120.2(4)      |
| C4     | C3     | C9     | 116.7(4)      |
| C6     | C3     | C9     | 119.8(6)      |
| C3     | C4     | C5     | 120.5(4)      |
| C3     | C4     | O4     | 118.7(4)      |
| C5     | C4     | O4     | 120.7(5)      |
| C1     | C5     | C4     | 119.6(6)      |
| C2     | C6     | C3     | 118.7(5)      |
| C2     | C6     | O2     | 118.2(4)      |
| C3     | C6     | O2     | 121.3(9)      |
| C6     | O2     | C7     | 112.1(4)      |
| O2     | C7     | C8     | 110.2(4)      |
| O2     | C7     | C10    | 109.3(4)      |
| C8     | C7     | C10    | 111.0(4)      |
| C7     | C8     | C9     | 108.3(4)      |
| C7     | C8     | O7     | 112.6(4)      |
| C9     | C8     | O7     | 110.5(4)      |
| C3     | C9     | C8     | 113.9(3)      |
| C3     | C9     | O3     | 120.6(4)      |
| C8     | C9     | O3     | 122.1(5)      |
| C7     | C10    | C11    | 118.7(3)      |
| C7     | C10    | C15    | 120.7(4)      |
| C11    | C10    | C15    | 118.8(5)      |
| C10    | C11    | C12    | 120.1(4)      |
| C11    | C12    | C13    | 119.7(4)      |
| C12    | C13    | C14    | 120.2(4)      |
| C12    | C13    | O5     | 119.5(6)      |
| C14    | C13    | O5     | 119.3(4)      |
| C13    | C14    | C15    | 118.8(4)      |
| C13    | C14    | O6     | 117.7(5)      |
| C15    | C14    | O6     | 119.9(4)      |
| C10    | C15    | C14    | 119.2(3)      |

**Table S6:** TREOR90 output for the autoindexing procedure for Phase 5.

A = 11.665695 0.010584 A Alfa = 100.263527 0.055482 Degrees  
 B = 10.065780 0.012088 A Beta = 93.248985 0.045177 Degrees  
 C = 7.722361 0.004526 A Gamma = 64.586708 0.086142 Degrees  
 Unit cell volume = 805.74 A\*\*3  

| H  | K | L | SST-OBS  | SST-CALC | DELTA | 2TH-OBS | 2TH-CALC | D-OBS   |
|----|---|---|----------|----------|-------|---------|----------|---------|
| 1  | 0 | 0 | 0.005371 | 0.005347 | 0.019 | 8.406   | 8.387    | 10.5101 |
| 1  | 1 | 0 | 0.007384 | 0.007376 | 0.005 | 9.859   | 9.854    | 8.9641  |
| 0  | 1 | 0 |          | 0.007393 |       |         | 9.865    |         |
| 2  | 1 | 0 |          | 0.018053 |       |         | 15.443   |         |
| -1 | 1 | 0 | 0.018110 | 0.018103 | 0.003 | 15.468  | 15.465   | 5.7238  |

|    |    |   |          |          |        |        |        |        |
|----|----|---|----------|----------|--------|--------|--------|--------|
| 0  | 1  | 1 | 0.020648 | 0.020649 | -0.000 | 16.523 | 16.524 | 5.3605 |
| 2  | 0  | 0 | 0.021400 | 0.021387 | 0.005  | 16.824 | 16.819 | 5.2655 |
| 1  | -1 | 1 | 0.025116 | 0.025079 | 0.013  | 18.237 | 18.224 | 4.8605 |
| 2  | 1  | 1 | 0.030618 | 0.030648 | -0.010 | 20.155 | 20.165 | 4.4021 |
| -2 | 0  | 1 | 0.032324 | 0.032328 | -0.001 | 20.715 | 20.716 | 4.2844 |
| 0  | -2 | 1 | 0.033972 | 0.033904 | 0.022  | 21.242 | 21.221 | 4.1792 |
| 2  | 2  | 1 | 0.045100 | 0.045075 | 0.007  | 24.522 | 24.515 | 3.6271 |
| 1  | -2 | 1 | 0.049700 | 0.049647 | 0.014  | 25.763 | 25.749 | 3.4552 |
| 1  | 1  | 2 | 0.053794 | 0.053789 | 0.001  | 26.822 | 26.821 | 3.3211 |
| 0  | 1  | 2 | 0.054458 | 0.054466 | -0.002 | 26.990 | 26.992 | 3.3008 |
| -2 | -1 | 2 |          | 0.054547 |        |        | 27.013 |        |
| -2 | -3 | 1 | 0.057738 | 0.057760 | -0.005 | 27.807 | 27.812 | 3.2057 |
| 0  | -2 | 2 | 0.058766 | 0.058796 | -0.007 | 28.059 | 28.066 | 3.1775 |
| 0  | -3 | 1 | 0.067867 | 0.067895 | -0.006 | 30.201 | 30.207 | 2.9568 |
| 2  | -2 | 1 | 0.075982 | 0.076085 | -0.022 | 32.001 | 32.024 | 2.7944 |
| 4  | 0  | 0 |          | 0.085548 |        |        | 34.014 |        |
| 0  | 3  | 1 | 0.085737 | 0.085744 | -0.001 | 34.052 | 34.054 | 2.6307 |
| -3 | 1  | 1 |          | 0.085851 |        |        | 34.076 |        |

Number of obs. Lines = 18

Number of calc. Lines = 23

M( 18) = 18 AV.EPS.= 0.0000261

F( 18) = 27.( 0.008077, 90)

HESS weights used

M cf. J.Appl.Cryst. 1 (1968) 108

F cf. J.Appl.Cryst. 12 (1979) 60

0 lines are unindexed.

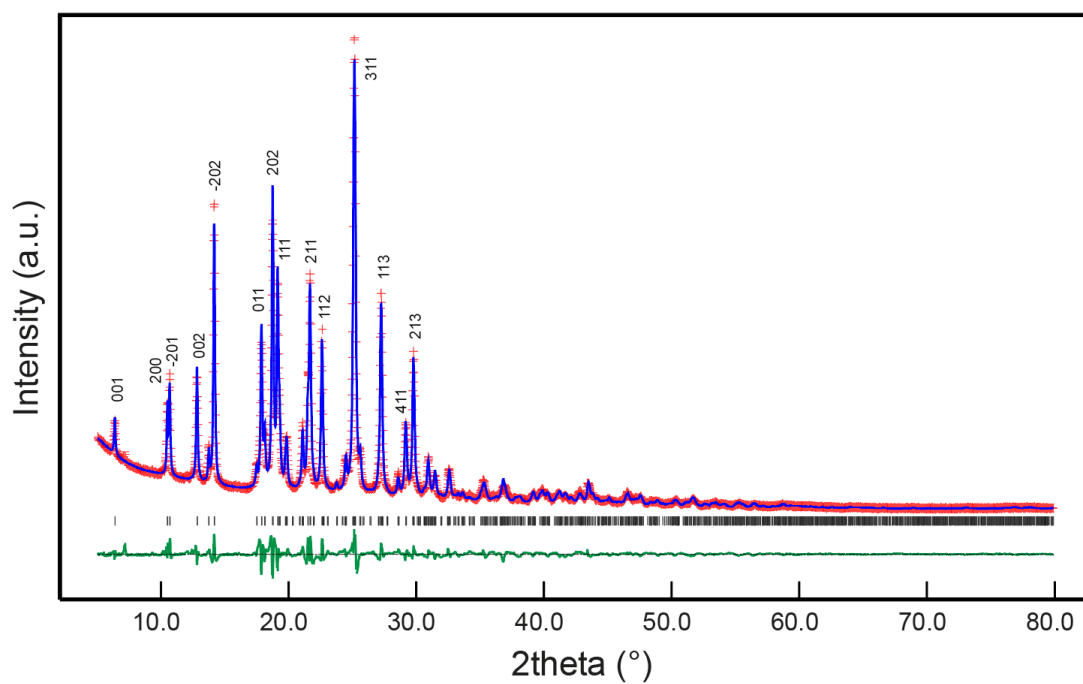

**Figure S1.** Rietveld plot of the last refinement cycle for **Phase 3**, showing the calculated profile (blue), the experimental pattern (red cross), and their difference (green).

Black marks indicate the calculated positions of Bragg peaks. Miller indices of most intense peaks are indicated.

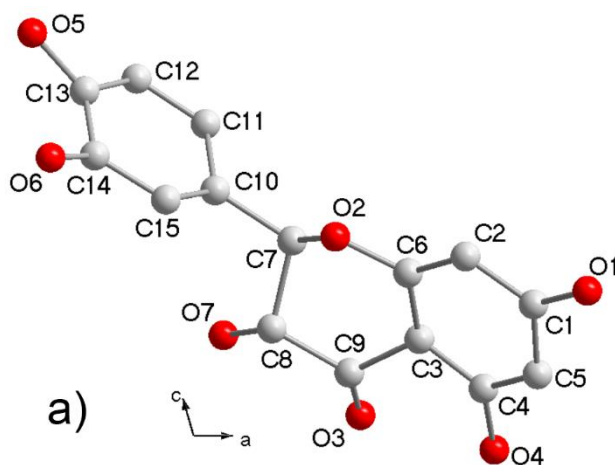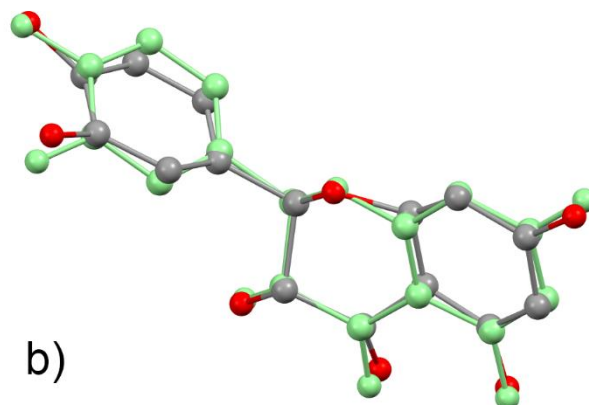

**Figure S2.** Asymmetric unit and labeling scheme for Phase 3 (a); comparison for superpositions of a Tax molecule in Phase 3 (grey and red) and in Phase 1 (green) (b).

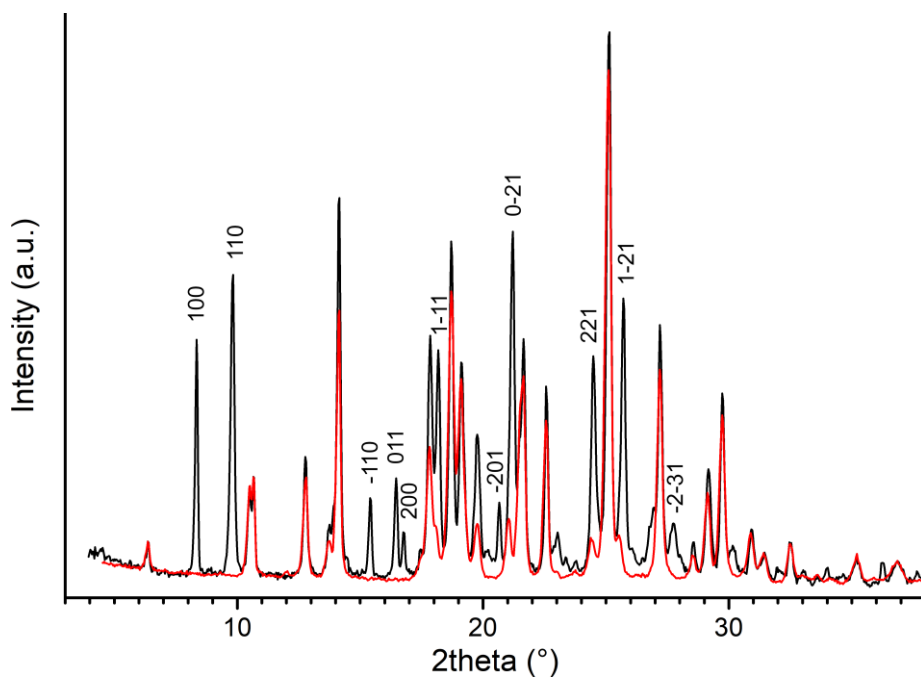

**Figure S3.** XRPD patterns of Tax-AET (black) and Tax-EA representative of **Phase 3** (red). Miller indices are referred to the unit cell obtained by an autoindexation procedure carried out with TREOR90 on the peaks not belonging to **Phase 3** (see Table S6) and assigned to **Phase 5**.

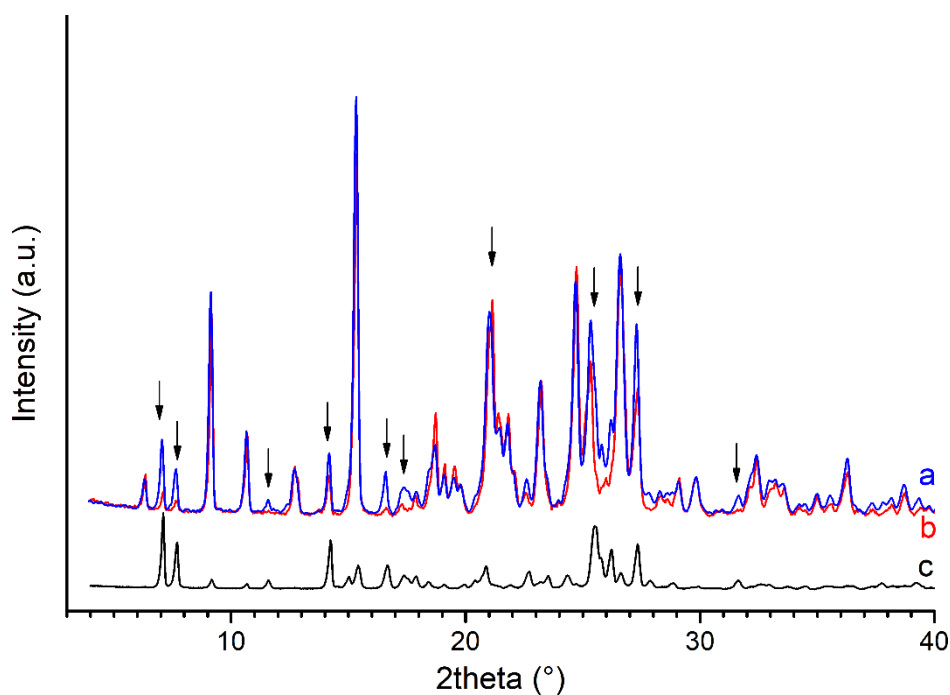

**Figure S4.** XRPD patterns of Pristine-Tax (a, blue line) and Tax-ACN (b, red line). The pattern of Tax-ET (**Phase 1**) is also reported, not in scale, for comparison (c, black line). Black arrows show the positions of intense peaks of Tax-ET that correspond to the regions with a relevant difference between the patterns of Pristine-Tax and Tax-ACN.

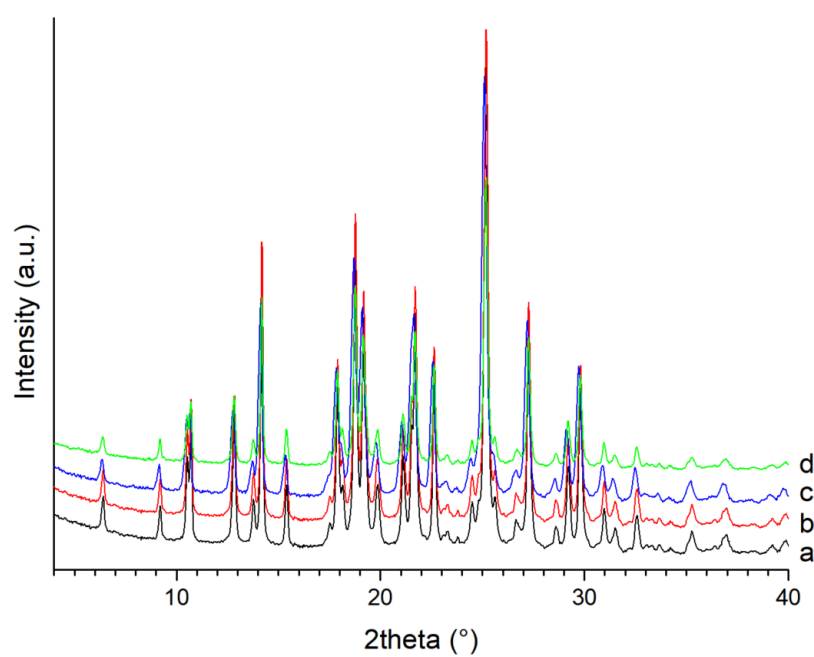

**Figure S5.** XRPD patterns of Tax-EA obtained after 14-day (b), 1-month (c), and 3-month (d) storage at 40 °C and 75% RH with respect to the starting Tax-EA (a).

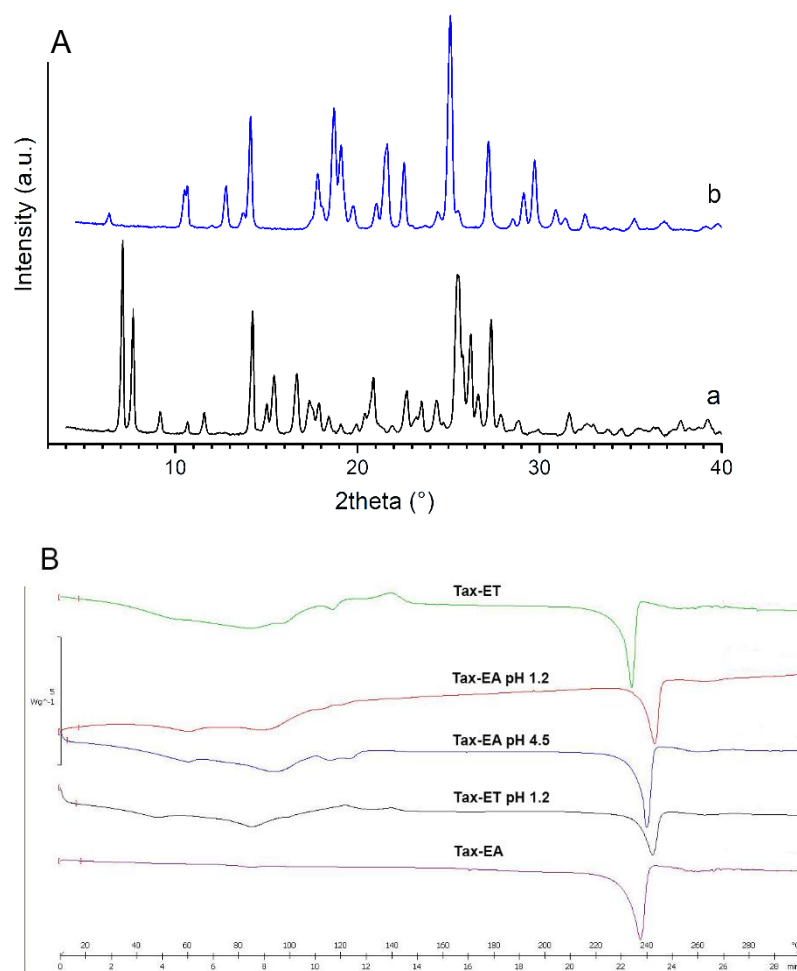



**Figure S6.** (A) Tax-EA XRPD patterns of the starting Phase 3 (b) and of the remaining solid recovered after 72 h of the equilibrium solubility study (a). (B) DSC curves of starting Tax-ET and Tax-EA and of the remaining solid recovered after 72 h of the equilibrium solubility study. The amount of Tax-ET powder recovered at pH 4.5 was not enough to perform the DSC analysis.

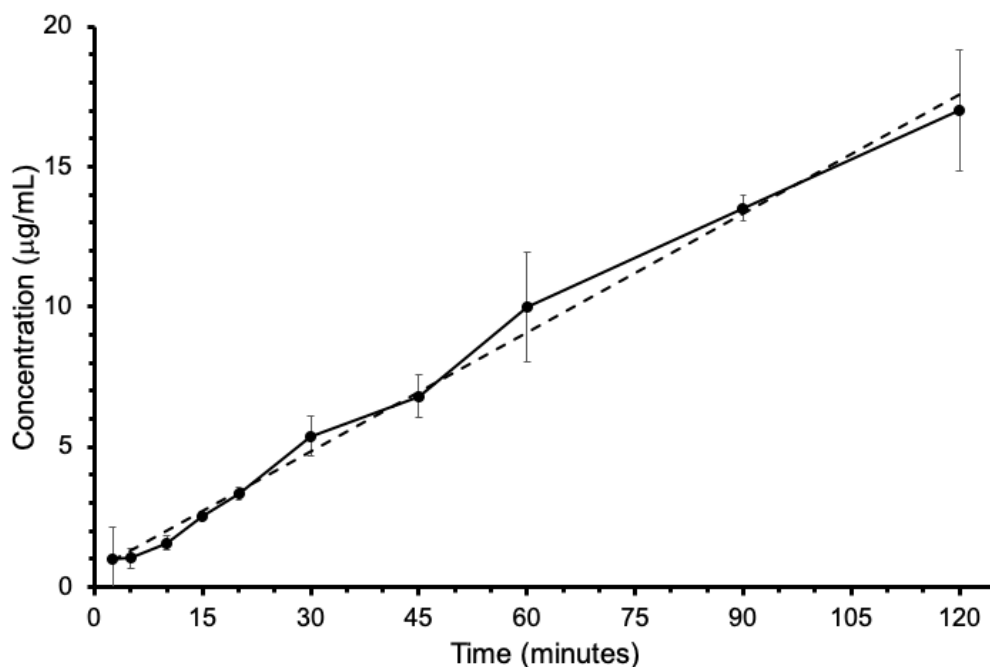

**Figure S7.** Intrinsic dissolution rate of Tax-ET in pH 4.5 solution using the rotating disk apparatus and 250 rpm agitation.

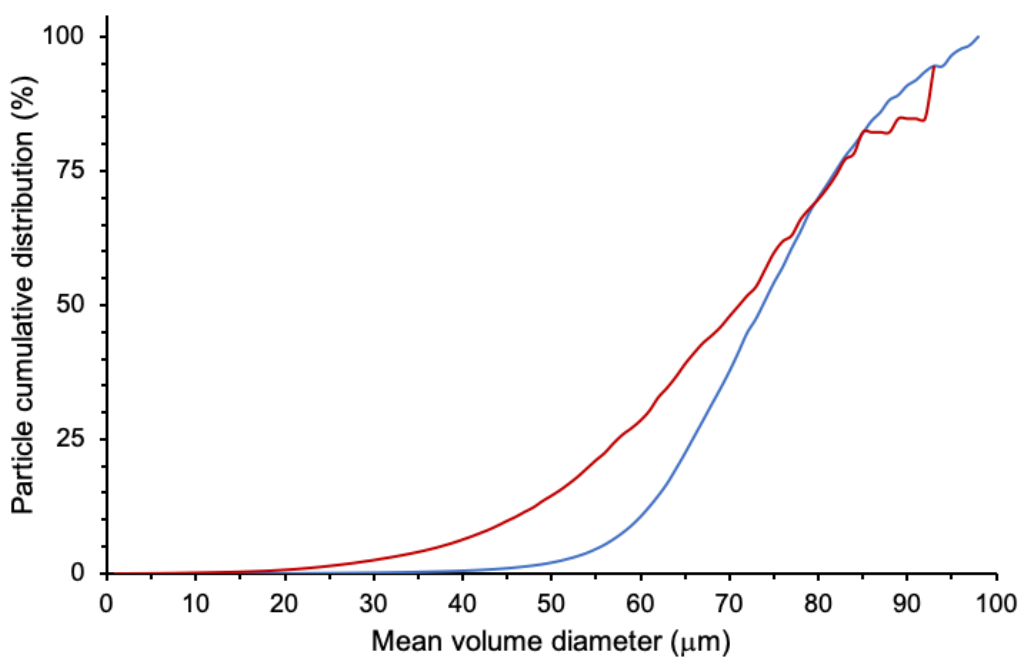

**Figure S8.** Particle cumulative size distribution of Tax-ET (blue) and Tax-EA (red).

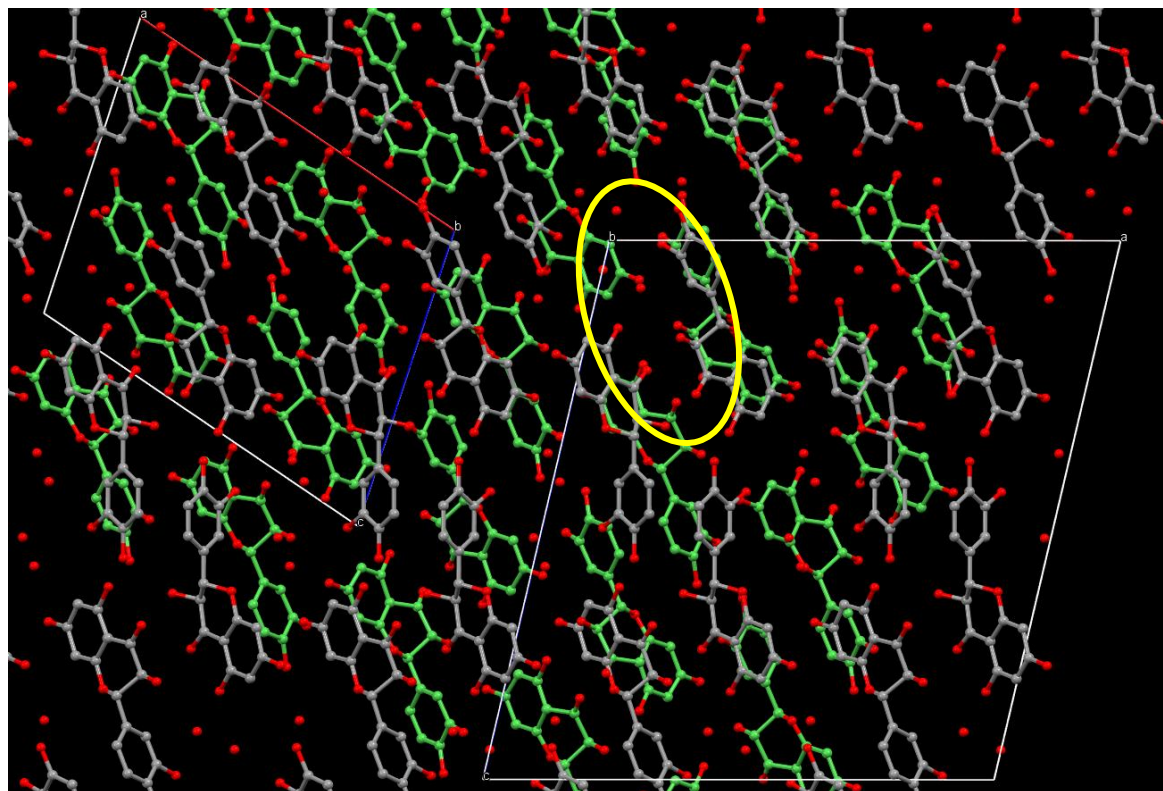

**Figure S9.** Superposition of Phase 3 (grey and red) and Phase 1 (green) crystal structures. The overlap began with the alignment of the row of molecules indicated by the yellow ellipse.
